# Supplementary material for: Cardiomyocyte p38 MAPKα suppresses a heart–adipose tissue–neutrophil crosstalk in heart failure development
Source: Springer Nature journal article supplement (doi:10.1007/s00395-022-00955-2), 2022-10-07
Supplement: MOESM1 [file 23581336]

## Supplementary Material

### Cardiomyocyte p38 MAPK $\alpha$ suppresses a heart – adipose tissue – neutrophil crosstalk in heart failure

Katharina Bottermann<sup>1,4</sup>, Lisa Kalfhues<sup>1</sup>, Rianne Nederlof<sup>1</sup>, Anne Hemmers<sup>1</sup>, Lucia M. Leitner<sup>1</sup>, Vici Oenarto<sup>1</sup>, Jana Nemmer<sup>1</sup>, Mirjam Pfeffer<sup>1</sup>, Vidisha Raje<sup>2</sup>, Rene Deenen<sup>3</sup>, Patrick Petzsch<sup>3</sup>, Heba Zabri<sup>4</sup>, Karl Köhrer<sup>3</sup>, Andreas S. Reichert<sup>5</sup>, Maria Grandoch<sup>6</sup>, Jens W. Fischer<sup>4,9</sup>, Diran Herebian<sup>7</sup>, Johannes Stegbauer<sup>8</sup>, Thurl E. Harris<sup>2</sup>, and Axel Gödecke<sup>1,9</sup>

<sup>1</sup>Department of Cardiovascular Physiology, Medical Faculty and University Hospital Düsseldorf, Heinrich-Heine-University Düsseldorf, Postfach 101007, 40001 Düsseldorf, Germany

<sup>2</sup>Department of Pharmacology, University of Virginia Health System, Charlottesville, VA, 22908, USA

<sup>3</sup>Biological and Medical Research Center (BMFZ), Medical Faculty, Heinrich-Heine-University, Universitätsstraße 1, 40225 Duesseldorf, Germany

<sup>4</sup>Institute of Pharmacology, Medical Faculty and University Hospital Düsseldorf, Heinrich-Heine-University Düsseldorf, Postfach 101007, 40001 Düsseldorf, Germany

<sup>5</sup>Institute of Biochemistry and Molecular Biology I, Medical Faculty and University Hospital Düsseldorf, Heinrich-Heine-University Düsseldorf, Postfach 101007, 40001 Düsseldorf, Germany

<sup>6</sup>Institute of Translational Pharmacology, Medical Faculty and University Hospital Düsseldorf, Heinrich-Heine-University Düsseldorf, Postfach 101007, 40001 Düsseldorf, Germany

<sup>7</sup>Department of General Pediatrics, Neonatology and Pediatric Cardiology, Medical Faculty and University Hospital Düsseldorf, Heinrich-Heine-University Düsseldorf, Postfach 101007, 40001 Düsseldorf, Germany

<sup>8</sup>Department of Nephrology, Medical Faculty and University Hospital Düsseldorf, Heinrich-Heine-University Düsseldorf, Postfach 101007, 40001 Düsseldorf, Germany

<sup>9</sup>CARID – Cardiovascular Research Institute Düsseldorf, Medical Faculty, Heinrich-Heine-University, Universitätsstraße 1, 40225 Duesseldorf, Germany

Address for correspondence: Axel Gödecke, Department of Cardiovascular Physiology, Heinrich-Heine-University, University Hospital Düsseldorf, Universitätsstraße 1, 40225 Düsseldorf, Postfach 101007, 40001 Düsseldorf, Germany, Phone: +49-211-8112670, Fax: +49-211-8112672, Axel.Goedecke@uni-duesseldorf.de

Supplemental Table S1: Primary and secondary antibodies used in western blot analysis

|     | Antibodies                              | Company        | No        | Dilution |
|-----|-----------------------------------------|----------------|-----------|----------|
| 1st | Mouse anti-p38 MAPK $\alpha$            | Cell Signaling | #9212     | 1:1000   |
|     | p38MAPK $\gamma$                        | Cell Signaling | #2307     | 1:1000   |
|     | Rabbit anti-p38 MAPK $\alpha$ T180/Y182 | Cell Signaling | #9216     | 1:1000   |
|     | Rabbit anti-MK2T334                     | Cell Signaling | #3007     | 1:1000   |
| 2nd | IRDye 680RD Goat anti-Mouse IgG         | Li-COR         | 925-68070 | 1:10 000 |
|     | IRDye 800CW Goat anti-Rabbit IgG        | Li-COR         | 925-32211 | 1:10 000 |
|     | IRDye 680RD Goat anti-Rabbit IgG        | Li-COR         | 926-68071 | 1:10 000 |
|     | IRDye 800CW Goat anti-Mouse IgG         | Li-COR         | 926-32210 | 1:10 000 |

Supplemental Table S2: Primer sequences

| Gene                 | Primer Orientation | Sequence               |
|----------------------|--------------------|------------------------|
| <i>Angptl4</i>       | Fwd                | ATGGAGTAGACAAGACTTCG   |
|                      | Rev                | TCACAGTTGACCAAAAATGG   |
| <i>Cxcl5</i>         | Fwd                | TGTTTGCTTAACCGTAACTC   |
|                      | Rev                | CAGTTTAGCTATGACTTCCAC  |
| <i>Cxcr2</i>         | Fwd                | CTACTGCAGGATTAAGTTTACC |
|                      | Rev                | GACGTATATTACAACCACAGC  |
| <i>Il1b</i>          | Fwd                | GGATGATGATAACCTGC      |
|                      | Rev                | CATGGAGAATATCACTTGTTGG |
| <i>Il6</i>           | Fwd                | AAGAAATGATGGATGCTACC   |
|                      | Rev                | GAGTTTCTGTATCTCTCTGAAG |
| <i>Nudc</i>          | Fwd                | AGAACTCCAAGCTATCAGAC   |
|                      | Rev                | CTTCAGGATTTCTGTTTCTTC  |
| <i>p38 MAPKalpha</i> | Fwd                | TCATTCACGCCAAAAGGACC   |
|                      | Rev                | CTGGCACTTCACGATGTTGT   |
| <i>p38 MAPKbeta</i>  | Fwd                | GACCTGAATAACATCGTCAAG  |
|                      | Rev                | GAGTGGATATACTTCAGCCC   |
| <i>p38 MAPKgamma</i> | Fwd                | TGAAGGGGCTGAAGTATATC   |
|                      | Rev                | CATCCAATTCAAGATGACCTC  |
| <i>p38 MAPKdelta</i> | Fwd                | CAGAAATGCTGACTGGAAAG   |
|                      | Rev                | CTGAATATAGGATTTGGCCG   |
| <i>Ppargc1a</i>      | Fwd                | TCCTCTTCAAGATCCTGTTAC  |
|                      | Rev                | CACATACAAGGGAGAATTGC   |
| <i>Pdk4</i>          | Fwd                | ACAATCAAGATTTCTGACCG   |
|                      | Rev                | TCTCCTTGAAAATACTTGGC   |
| <i>Slc2a4</i>        | Fwd                | CAATGGTTGGGAAGGAAAAG   |
|                      | Rev                | AATGAGTATCTCAGGAGGC    |
| <i>Tgfb2</i>         | Fwd                | GAGATTTGCAGGTATTGATGG  |
|                      | Rev                | CAACAACATTAGCAGGAGATG  |

Supplemental Table S3: Antibodies used for FACS analysis

| Antibody                            | Clone       | Supplier (cat#)          |
|-------------------------------------|-------------|--------------------------|
| Anti-CD45                           | 30-F11      | BD Biosciences (563891)  |
| Anti-CD3                            | 145-2C11    | Biolegend (100312)       |
| Anti-CD19                           | 1D3         | BD Biosciences (557399)  |
| Anti-CD4                            | RM4-5       | BD Biosciences (558107)  |
| Anti-CD8a                           | 53-6.7      | BD Biosciences (100766)  |
| Anti-CD11b                          | M1/70       | Biolegend (101217)       |
| Anti-Ly6G                           | 1A8         | Biolegend (127615)       |
| Anti-CD64                           | X54-5/7.1   | Biolegend (139303)       |
| Anti-MHCII                          | M5/114.15.2 | Biolegend (107613)       |
| Anti-CCR2                           | SA203G11    | Biolegend (150605)       |
| Anti-Ly6C                           | AL-21       | BD Biosciences (562727)  |
| 7AAD                                |             | Biolegend (420404)       |
| Fixable viability dye eFluor<br>780 |             | eBioscience (65-0865-14) |

Supplemental Table S4: Echocardiographic measurements calculated from Simpson's Mode for control and iCmp38αKO hearts over time course (baseline, 12, 24 and 48 hours AngII treatment). Data are mean ± SD. Baseline values showed no statistically significant differences. Data were analyzed using two-way ANOVA followed by Bonferoni post-test. Comparison to control: \* p<0.05, \*\* p<0.01, \*\*\* p<0.001, Comparison to baseline: °p<0.05, °°p<0.01, °°°p<0.001

| <b>Control</b>         |        | <b>Baseline</b> |      | <b>12h AngII</b> |      |     | <b>24h AngII</b> |      |            | <b>48h AngII</b> |      |            |
|------------------------|--------|-----------------|------|------------------|------|-----|------------------|------|------------|------------------|------|------------|
| Parameter              |        | Mean            | SD   | Mean             | SD   |     | Mean             | SD   |            | Mean             | SD   |            |
| Cardiac Output         | ml/min | 27.0            | 4.3  | 21.3             | 2.4  | °   | 23.7             | 2.3  |            | 22.8             | 8.0  |            |
| Ejection Fraction      | %      | 59.8            | 4.7  | 41.5             | 12.0 | °°° | 46.9             | 3.9  | °°         | 49.1             | 12.0 | °          |
| Fractional Area Change | %      | 48.5            | 6.6  | 31.5             | 16.0 | °°° | 27.2             | 2.3  | °°°        | 31.4             | 13.4 | °°°        |
| Fractional Shortening  | %      | 12.0            | 3.8  | 7.4              | 1.7  |     | 11.7             | 3.2  |            | 15.0             | 7.3  |            |
| Stroke Volume          | ul     | 46.8            | 6.7  | 34.4             | 3.3  | °°  | 39.3             | 4.2  |            | 38.0             | 13.1 | °          |
| End Diastolic Volume   | ul     | 78.7            | 12.1 | 88.6             | 25.5 |     | 84.1             | 7.9  |            | 76.6             | 10.6 |            |
| End Systolic Volume    | ul     | 31.9            | 7.3  | 54.2             | 22.3 | °°  | 44.8             | 6.1  |            | 38.6             | 9.4  |            |
| Heart Rate             | bpm    | 574             | 19.5 | 617              | 30.8 | °   | 591              | 21.7 |            | 588              | 40.2 |            |
| <b>iCmp38αKO</b>       |        | <b>Baseline</b> |      | <b>12h AngII</b> |      |     | <b>24h AngII</b> |      |            | <b>48h AngII</b> |      |            |
| Parameter              |        | Mean            | SD   | Mean             | SD   |     | Mean             | SD   |            | Mean             | SD   |            |
| Cardiac Output         | ml/min | 27.4            | 4.6  | 19.2             | 3.2  | °°  | 18.3             | 3.4  | °°°        | 18.4             | 5.2  | °°°        |
| Ejection Fraction      | %      | 59.6            | 8.1  | 33.3             | 5.6  | °°° | 24.1             | 5.3  | ***<br>°°° | 29.0             | 7.6  | ***<br>°°° |
| Fractional Area Change | %      | 48.4            | 8.2  | 20.8             | 6.6  | °°° | 13.4             | 6.5  | °°°        | 15.0             | 7.0  | **<br>°°°  |
| Fractional Shortening  | %      | 13.3            | 4.8  | 7.9              | 0.9  | °   | 5.3              | 2.1  | °°°        | 7.0              | 3.9  | **<br>°°   |
| Stroke Volume          | ul     | 48.6            | 8.5  | 30.7             | 4.4  | °°° | 30.5             | 4.3  | °°°        | 31.3             | 6.8  | °°°        |
| End Diastolic Volume   | ul     | 83.8            | 22.5 | 92.5             | 5.1  |     | 129.2            | 18.7 | ***<br>°°° | 109.7            | 14.6 | **<br>°°   |
| End Systolic Volume    | ul     | 35.3            | 15.8 | 61.8             | 8.0  | °°° | 98.7             | 19.3 | ***<br>°°° | 78.4             | 16.5 | ***<br>°°° |
| Heart Rate             | bpm    | 561.4           | 24.3 | 620.8            | 27.2 | °°° | 580.6            | 21.5 |            | 570              | 41.5 |            |

Supplemental Table S5: Atglistatin treatment: Cardiac function calculated from Simpson's mode of iCmp38αKO and control mice at baseline (day -2) and before AngII administration (day 0). Statistical analysis was performed using two-way ANOVA with Bonferroni's multiple comparisons test to compare the two timepoints within each group. No statistically significant differences.

| Parameter              | Units  | Control day -2 |       | Control day 0 |       | KO day -2 |       | KO day 0 |       |
|------------------------|--------|----------------|-------|---------------|-------|-----------|-------|----------|-------|
|                        |        | Mean           | SD    | Mean          | SD    | Mean      | SD    | Mean     | SD    |
| Cardiac Output         | ml/min | 30.73          | 4.04  | 27.38         | 4.27  | 27.88     | 4.51  | 28.37    | 2.47  |
| Ejection Fraction      | %      | 60.41          | 5.54  | 58.67         | 2.53  | 56.27     | 7.57  | 60.54    | 5.29  |
| Fractional Area Change | %      | 53.84          | 9.36  | 49.40         | 4.25  | 46.32     | 8.81  | 50.43    | 9.61  |
| Fractional Shortening  | %      | 15.96          | 3.68  | 14.64         | 4.13  | 15.19     | 2.81  | 18.19    | 5.75  |
| Stroke Volume          | μL     | 54.23          | 8.00  | 51.32         | 6.52  | 49.35     | 7.26  | 52.42    | 3.82  |
| End Diastolic Volume   | μL     | 90.68          | 16.55 | 87.45         | 10.20 | 88.95     | 15.70 | 87.26    | 10.40 |
| End Systolic Volume    | μL     | 36.45          | 10.59 | 36.13         | 4.73  | 39.60     | 12.46 | 34.84    | 8.14  |
| HR                     | bpm    | 569.50         | 27.95 | 542.75        | 28.38 | 565.50    | 31.58 | 551.70   | 30.46 |

Supplemental Table S6: Cardiac function calculated from Simpson's mode of iCMp38 $\alpha$ KO and control mice before granulocyte depletion. No statistically significant differences were found between control and KO.

| Parameter              | Units  | Control Baseline |       | KO Baseline |       |
|------------------------|--------|------------------|-------|-------------|-------|
|                        |        | Mean             | SD    | Mean        | SD    |
| Cardiac Output         | ml/min | 28.37            | 2.86  | 31.36       | 5.55  |
| Ejection Fraction      | %      | 62.76            | 8.39  | 59.75       | 6.57  |
| Fractional Area Change | %      | 51.56            | 8.92  | 47.89       | 7.20  |
| Fractional Shortening  | %      | 14.96            | 4.50  | 13.38       | 4.26  |
| Stroke Volume          | ul     | 51.10            | 6.15  | 56.40       | 10.25 |
| End Diastolic Volume   | ul     | 82.64            | 14.71 | 95.70       | 21.01 |
| End Systolic Volume    | ul     | 31.54            | 11.91 | 39.30       | 13.36 |
| HR                     | bpm    | 568              | 50    | 562         | 18.4  |

A

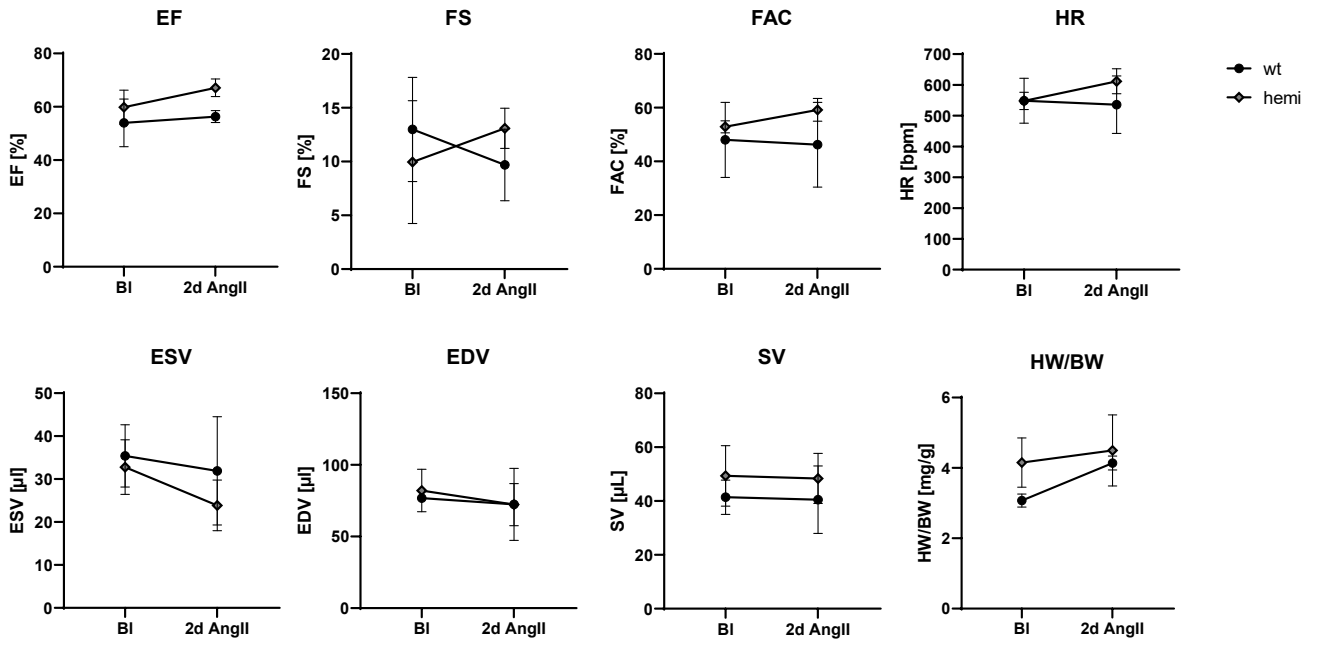

Supplemental Fig. S1.: Cardiac function and volumes, heart rate and heart weight/body weight ratio in MerCreMer hemizygous male mice (hemi) and wildtype (wt) littermates at baseline and after 2d AngII treatment. No statistical significant differences were detected between the two groups at both time points. Data are presented as mean ± SD, hemi n=4, wt n=2, two-way ANOVA followed by Bonferoni's multiple comparisons test, compared were hemi vs wt at baseline and 2d AngII.



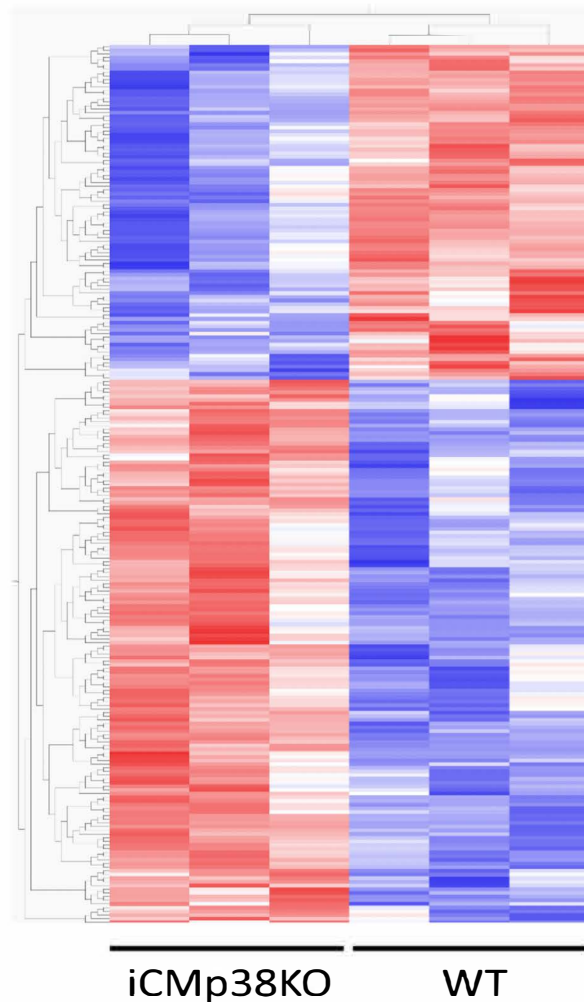

| Pathway                                             | -log P-value | Z-score | Down-regulated | No change  | Up-regulated | No overlap with dataset | Molecules                                                                        |
|-----------------------------------------------------|--------------|---------|----------------|------------|--------------|-------------------------|----------------------------------------------------------------------------------|
| <b>Oxidative Phosphorylation</b>                    | 8,4          | -3,32   | 11/110 (10%)   | 0/110 (0%) | 0/110 (0%)   | 99/110 (90%)            | ATP5F1D, COX6A1,COX8A, NDUFA11,NDUFA2,NDUFA5,NDUFB10,NDUFB7,NDUFS8,NDUFV3, UQCRQ |
| <b>Superpathway of Inositol Phosphate Compounds</b> | 1,75         | 2,45    | 0/232 (0%)     | 0/232 (0%) | 6/232 (3%)   | 226/232 (97%)           | IP6K3,MTMR9, PAWR,PIK3R1,PPIP5K1,PTPN11                                          |
| <b>3-phosphoinositide Biosynthesis</b>              | 1,46         | 2,24    | 0/202 (0%)     | 0/202 (0%) | 5/202 (2%)   | 197/202 (98%)           | MTMR9,PAWR, PIK3R1,PPIP5K1, PTPN11                                               |

Supplemental Fig. S2: A: Hierarchical clustering of differentially expressed genes in hearts of control (WT) and iCmp38KO mice after 12h of AngII treatment. ( $p < 0.05$ , fold change  $> 1.3$ ). B: Result of pathway analysis using Ingenuity Pathway Analysis software (IPA<sup>®</sup>, Qiagen Inc.). Only pathways with  $-\log P$ -value  $< 1.3$  ( $0.05$ ) and an absolute activation Z-score  $> 2$  were considered to be affected. Only a small number of genes assembled under the respective term was found to be differentially expressed.

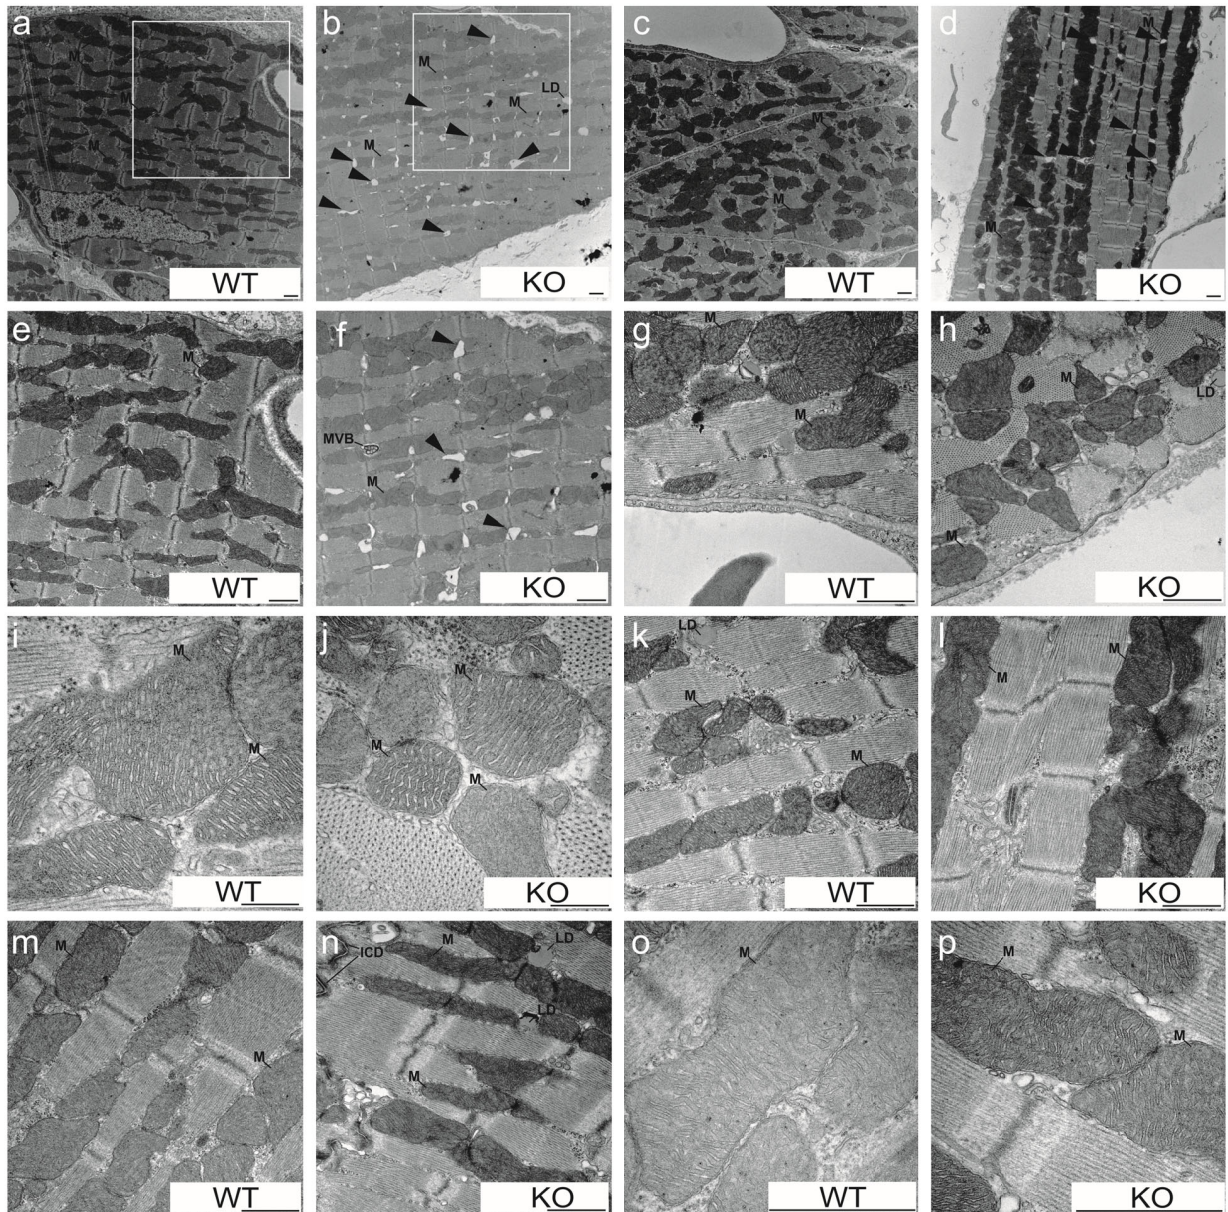

Supplemental Fig. S3: Transmission electron microscopy of control (WT) and iCmp38KO (KO) hearts. Tissue samples from three regions of the heart were chemically fixed by 1.2% glutaraldehyde and 1% paraformaldehyde, and ultrathin sections were analysed by standard transmission electron microscopy. a, b, e, f sections from LV free wall ; c, d, g, h, i, j, k, l, sections from anterior wall ; m, n, o, p sections from interventricular septum . MVB, multivesicular body; LD, lipid droplet; M, mitochondrion; ICD, intercalated disc; arrow heads show enlarged lumen at T-tubule cross sections which were observed in iCmp38KO sections only. T-tubule swelling has been observed also in human DCM. Scale bars, 1  $\mu$ m.

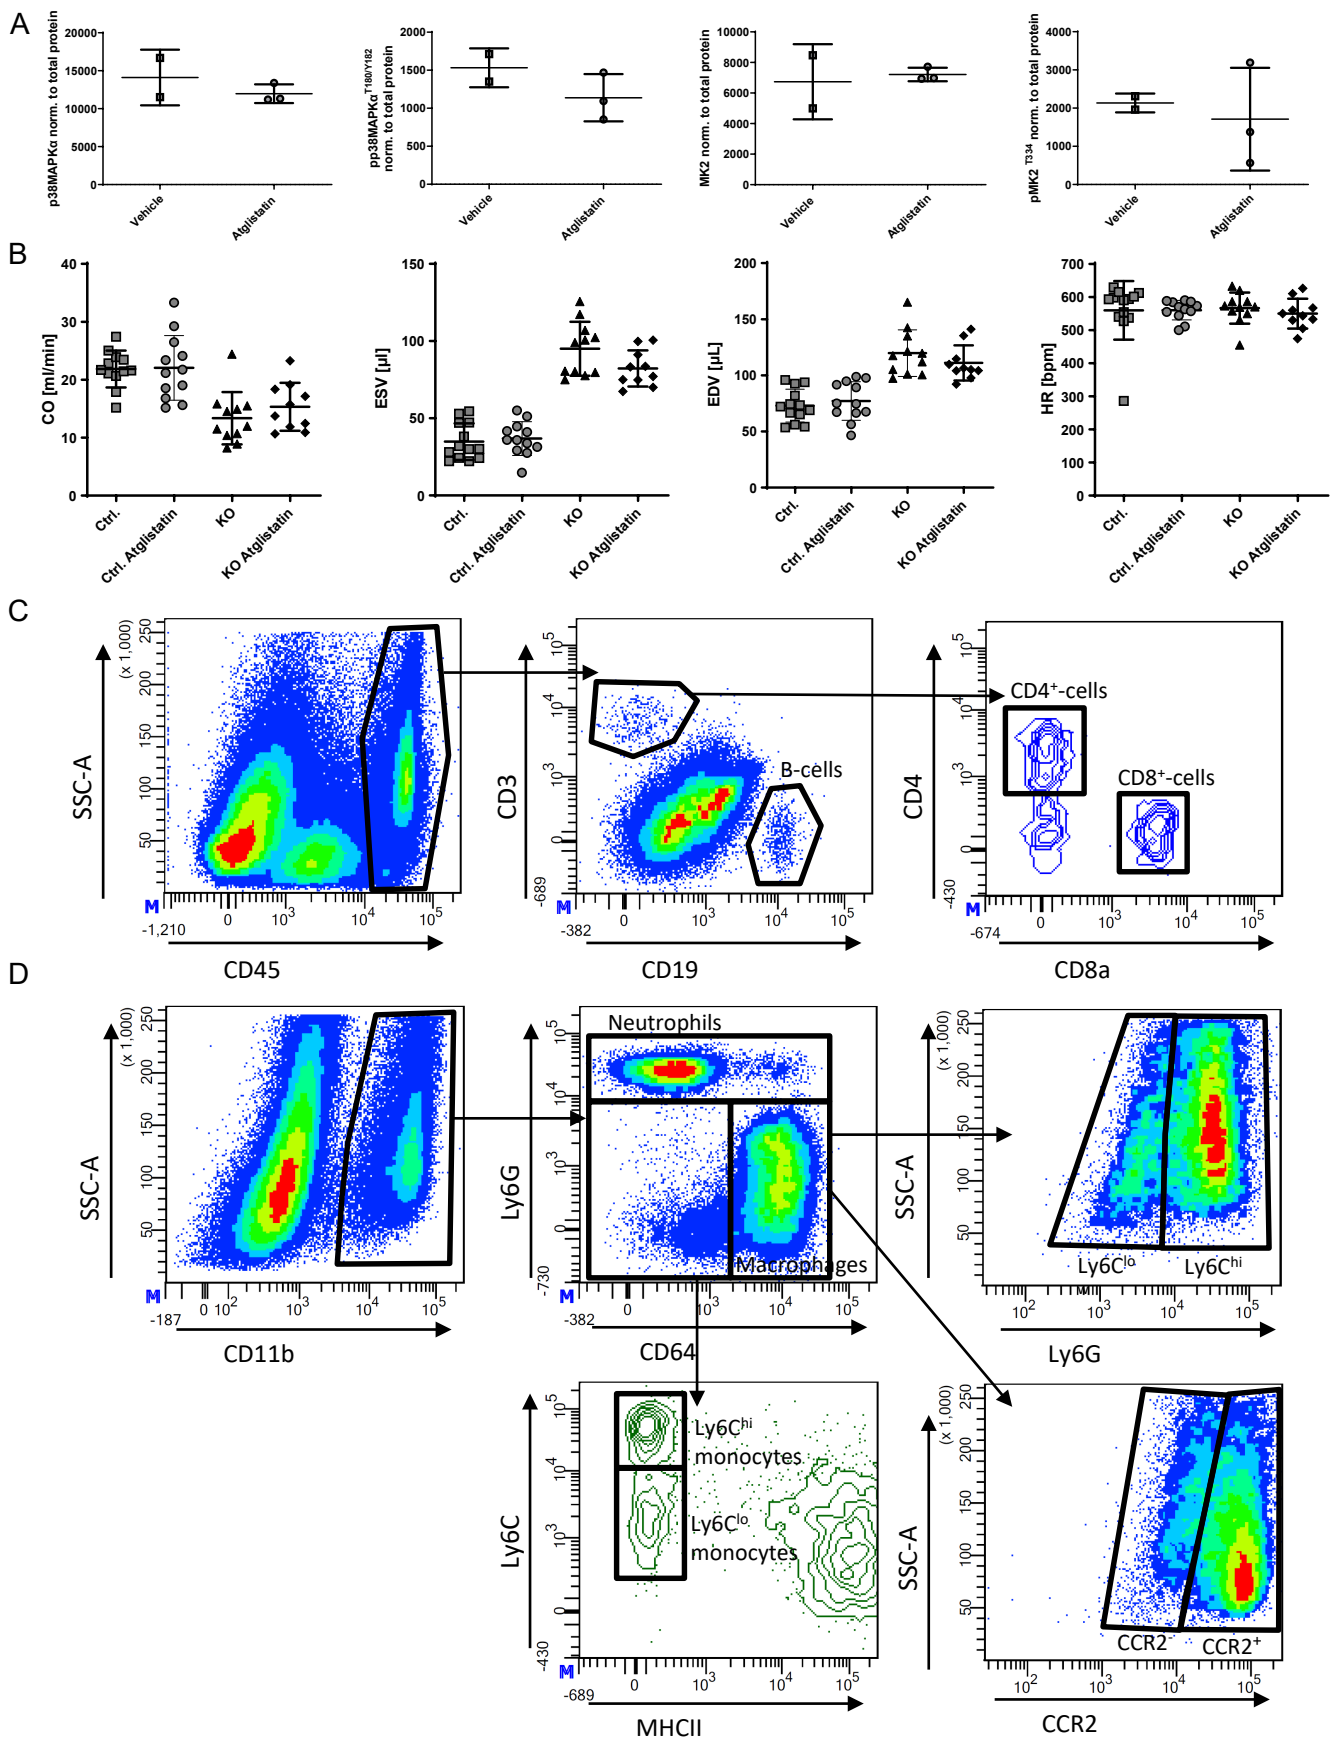

Supplemental Fig. S4.: A) Protein expression of p38MAPK $\alpha$ , pp38MAPK $\alpha$ , MK2 and pMK2 in vehicle and Atglistatin treated control animals B) Cardiac output (CO), end systolic (ESV) and end diastolic volume (EDV) and heart rate (bpm) of iCmp38 $\alpha$  control and KO mice after 2 days of Angiotensin II either treated with Atglistatin or vehicle. B) Gating scheme for flow cytometric analysis of B-lymphocytes (CD45 $^{+}$ CD19 $^{+}$ ) and CD4 $^{+}$ , and CD8 $^{+}$  T-lymphocytes (CD45 $^{+}$ CD3 $^{+}$ ) in heart cell preparations. C) Gating scheme for flow cytometric analysis of neutrophils (CD11b $^{+}$ Ly6G $^{+}$ ), Ly6C $^{hi}$  and Ly6C $^{lo}$  monocytes (CD11b $^{+}$ Ly6G $^{+}$ CD64 $^{-}$ MHCII $^{-}$ ), and CCR2 $^{+}$ , CCR2 $^{-}$ , Ly6C $^{hi}$  and Ly6C $^{lo}$  macrophages (CD11b $^{+}$ Ly6G $^{+}$ CD64 $^{+}$ ) in heart cell preparations.

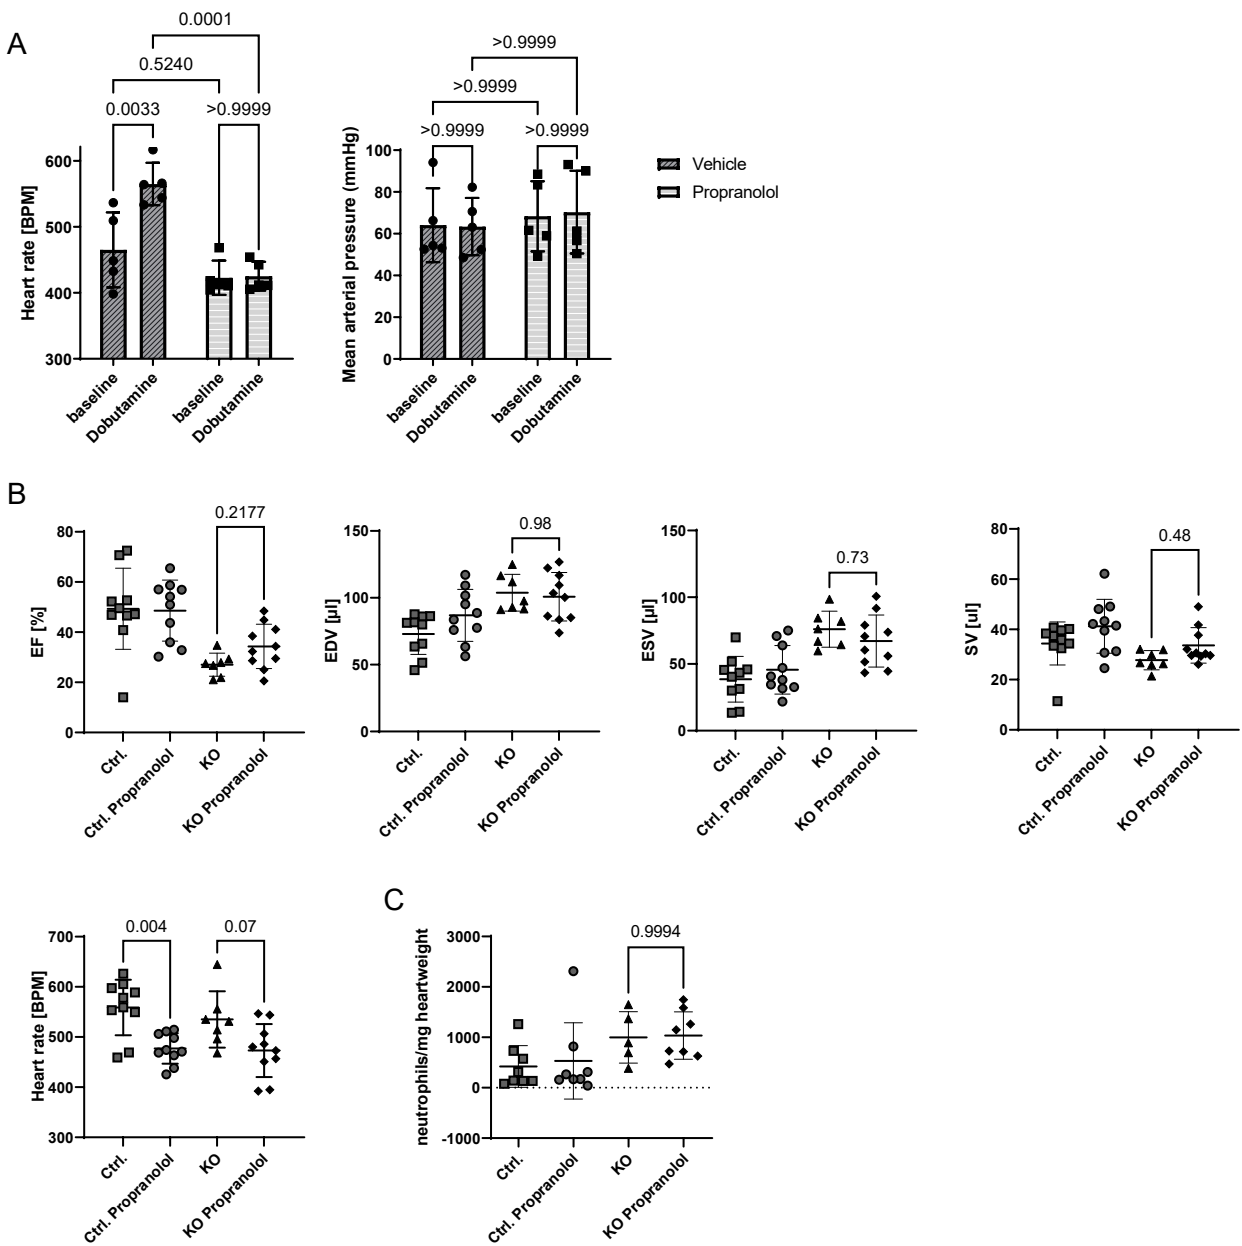

Supplemental Fig. S5: A) Heart rate and mean arterial pressure in vehicle and propranolol treated wildtype animals at baseline and after dobutamine treatment. Propranolol prevents increase in heart rate due to dobutamine treatment and does not lower blood pressure. Two-way ANOVA with Bonferroni's multiple comparisons test was used. B) Ejection fraction (EF), end diastolic (EDV), end systolic (ESV), stroke volume (SV) and heart rate of iCmp38 $\alpha$  control and KO mice after 2 days of Angiotensin II either treated with propranolol or vehicle. One-way ANOVA with Tukey's multiple comparisons test was used. C) Neutrophil number/mg heart weight in hearts of iCmp38 $\alpha$  control and KO mice after 2 days of Angiotensin II either treated with propranolol or vehicle. One-way ANOVA with Tukey's multiple comparisons test was used. All data are mean  $\pm$  SD.

KO AB

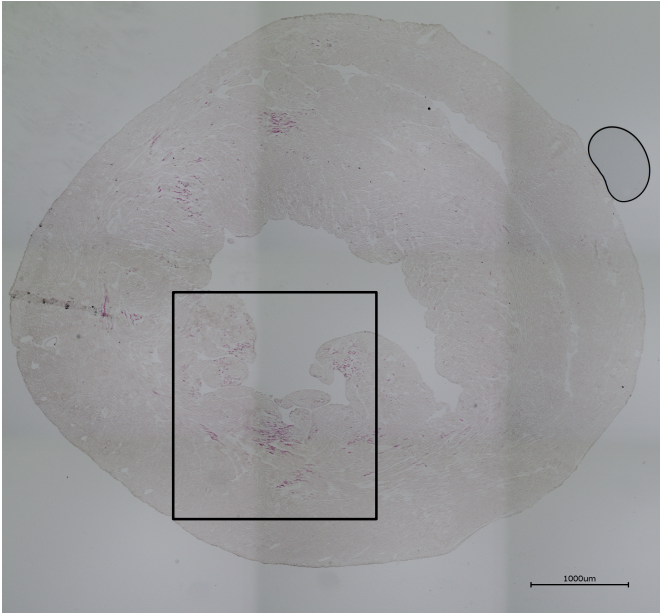

KO IT

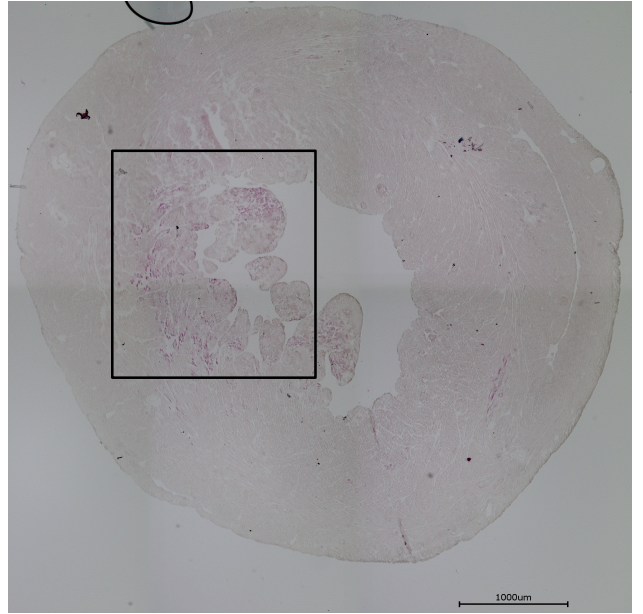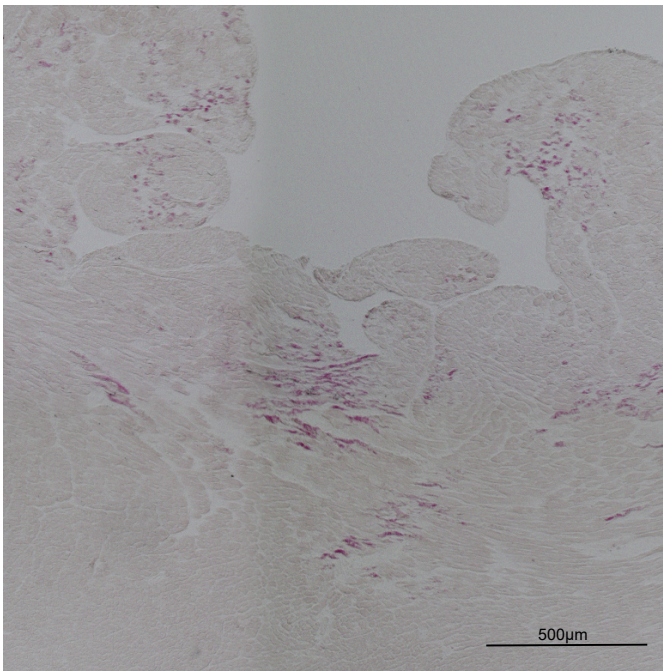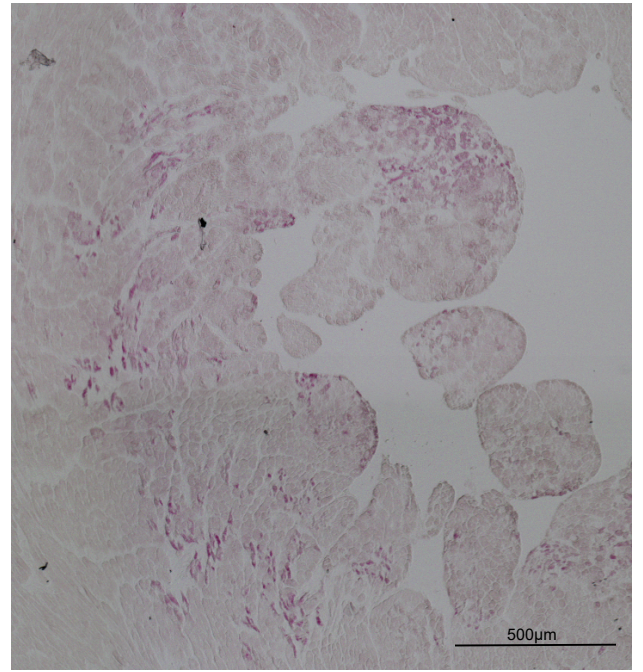

Supplemental Fig. S6: Sudan Red 7B Staining of iCmp38αKO hearts after 48h AngII either treated with anti-Ly6G antibody (AB) or isotype control (IT). Lower panels show corresponding magnifications of indicated areas.
